# Supplementary material
Source: publisher site journal article supplement (https://www.dovepress.com/article/474801)
Supplement: Supplementary file 1 [file get_supplementary_file.php]

| **Supplementary Table 1.** Estimated AUCs of PNI, NRI, NRS-2002 and BMI in predicting OS at various time points   | Time after surgery | AUC of PNI | AUC of NRI | AUC of BMI | AUC of NRS-2002 | | --- | --- | --- | --- | --- | | OS |  |  |  |  | | 1 year | 0.682 | 0.596 | 0.486 | 0.676 | | 3 years | 0.673 | 0.563 | 0.582 | 0.640 | | 5 years | 0.723 | 0.580 | 0.608 | 0.620 |   AUC area under the time-dependent ROC curve; BMI, body mass index; NRI, nutritional risk index; PNI, prognostic nutritional index; NRS-2002, Nutrition Risk Screening 2002; OS, overall survival |  |
| --- | --- | --- | --- | --- | --- | --- | --- | --- | --- | --- | --- | --- | --- | --- | --- | --- | --- | --- | --- | --- | --- | --- | --- | --- | --- | --- |

**Supplementary Figure 1.** X-tile analyses to determine the optimal cutoff values of (A) PNI and (B)NRI. The optimal cutoff value of PNI and NRI were 41.2, and 90.5, respectively.


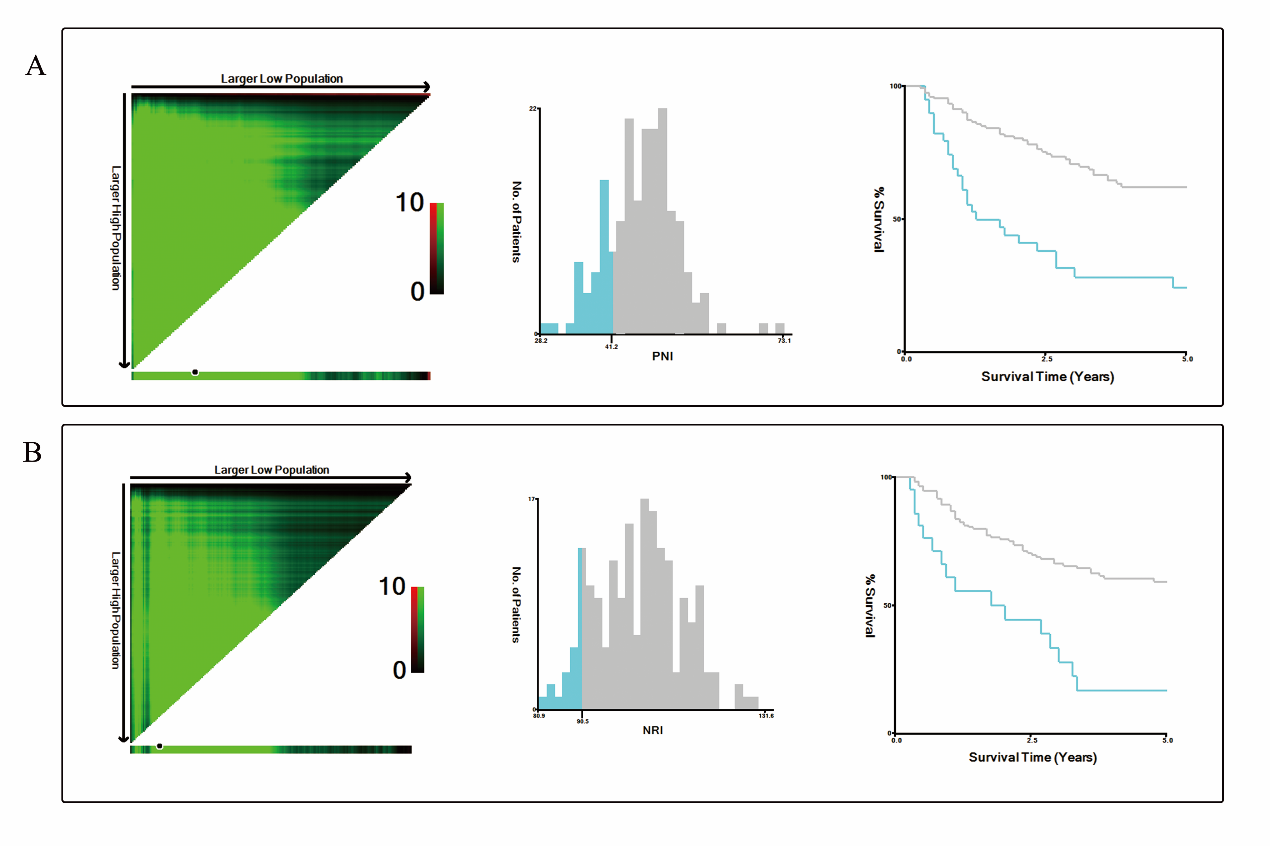


**Supplementary Table 2.** Univariate analyses to determine risk factors of major complication

| Variables | Major complication | |
| --- | --- | --- |
| OR (95% CI) | P value |
| Gender (female vs. male) | 1.069 (0.553-2.067) | 0.844 |
| Age (years) | 1.017 (0.986-1.049) | 0.278 |
| Multifocality (no vs. yes) | 1.008 (0.971-1.047) | 0.665 |
| Presentation (recurrence vs. primary) | 1.439 (0.744-2.782) | 0.280 |
| Size (cm) | 0.892 (0.455-1.746) | 0.738 |
| Histologic subtypes |  | 0.420 |
| DD vs. WD | 1.788 (0.785-4.070) | 0.166 |
| Myxoid/Round Cell vs. WD | 0 | 0.999 |
| Pleomorphic vs. WD | 2.963 (0.690-12.723) | 0.144 |
| FNCLCC grade |  | 0.173 |
| G2 vs. G1 | 2.306 (0.903-5.889) | 0.081 |
| G3 vs. G1 | 2.338 (0.884-6.181) | 0.087 |
| No. of resected organs | 1.058 (0.898-1.246) | 0.501 |
| NRS2002 (≥3 vs. <3) | 1.643 (0.764-3.533) | 0.204 |
| NRI (≥90.5 vs. < 90.5) | 0.772 (0.279-2.136) | 0.618 |
| PNI (≥41.2 vs. < 41.2) | 0.572 (0.293-1.116) | 0.102 |

Abbreviations: WD, well-differentiated; DD, dedifferentiated; NRI, nutritional risk index; PNI, prognostic nutritional index; NRS-2002, Nutrition Risk Screening 2002; FNCLCC, French National Federation of the Centers for the Fight Against Cancer
